# Supplementary material for: Polar tongue of ionisation during geomagnetic superstorm
Source: Copernicus journal article supplement (doi:10.5194/angeo-2021-19), 2021-04-07

UT = 14:00

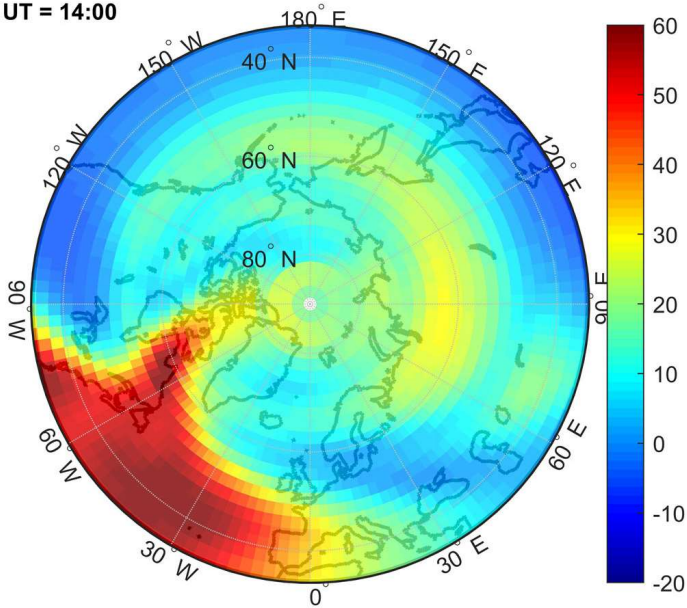

UT = 14:20

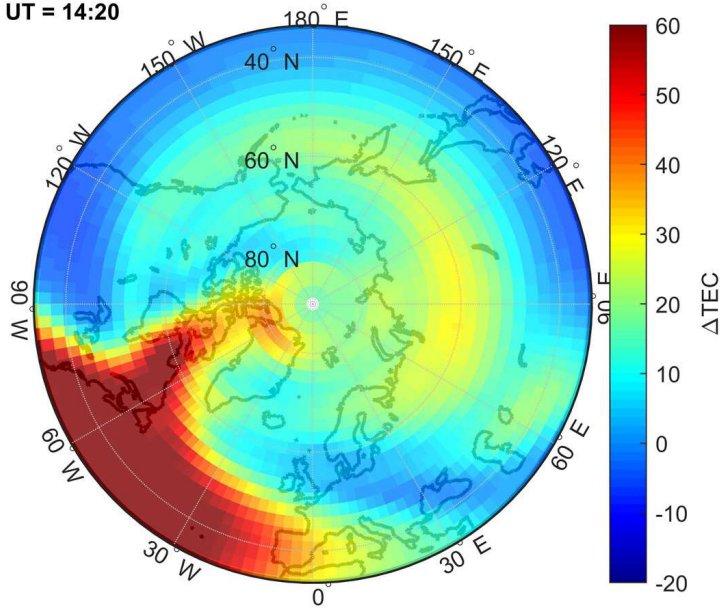

UT = 14:40

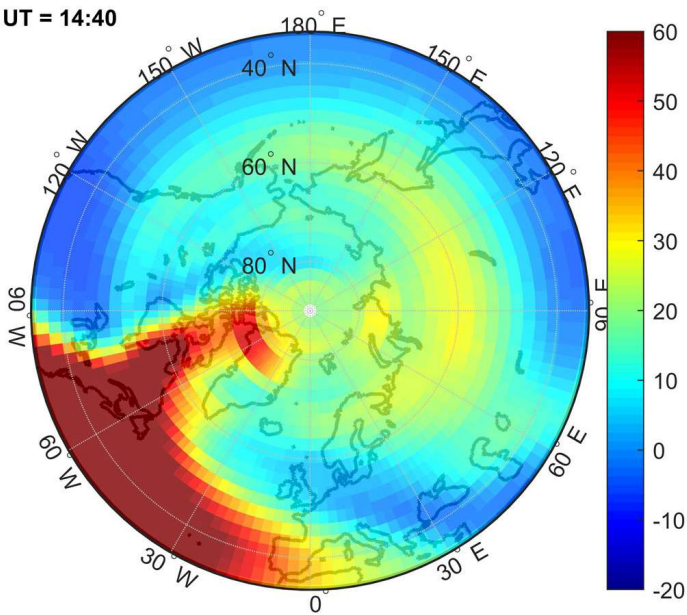

UT = 15:00

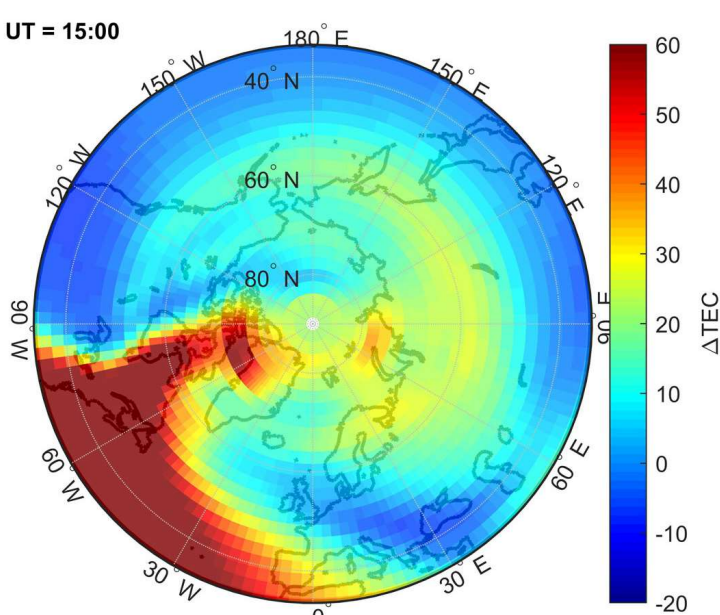

UT = 15:20

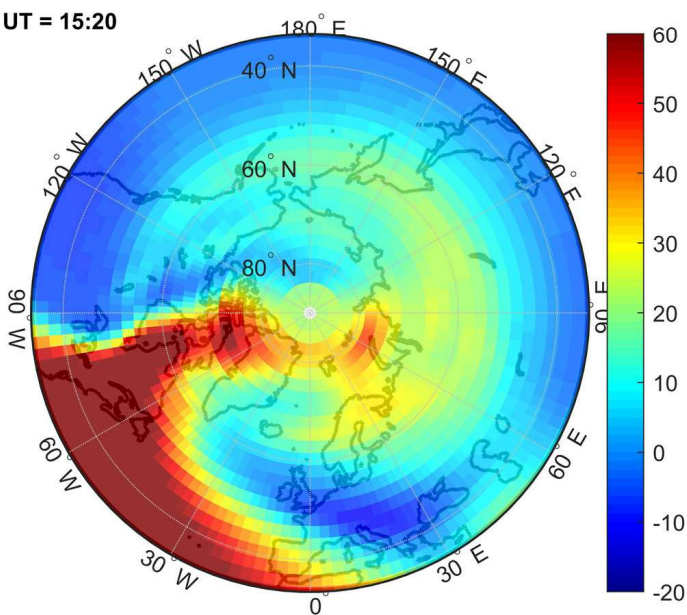

UT = 15:40

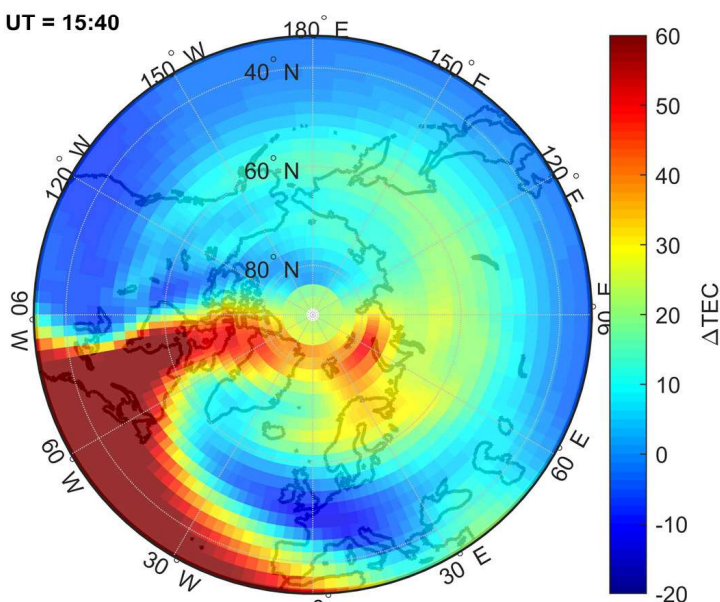

Supplement: Supplementary file [file angeo-2021-19-AC1-supplement.pdf]
